1 Could Metformin use reduce abdominal aortic aneurysm risk? A Mendelian randomisation  
2 study using known Metformin targets

3 **Authors:**

4 Katie L Saxby MSc<sup>1</sup>, Frank Dudbridge PhD<sup>2,3</sup>, Nilesh J Samani MD<sup>1,2</sup>, Matthew J Bown MD<sup>1,2</sup>,  
5 Christopher P Nelson PhD<sup>1,2</sup>

6 <sup>1</sup>Department of Cardiovascular Sciences, University of Leicester, Leicester, United Kingdom.

7 <sup>2</sup>NIHR Leicester Biomedical Research Centre, University of Leicester, Leicester, United  
8 Kingdom.

9 <sup>3</sup>Department of Population Health Sciences, University of Leicester, Leicester, United  
10 Kingdom.

11

12 **Corresponding author:** Katie L Saxby, [kls46@leicester.ac.uk](mailto:kls46@leicester.ac.uk), Cardiovascular Research  
13 Centre, Glenfield Hospital, Groby Road, Leicester, LE3 9QP.

14

15 **Abstract:**

16

17 **Introduction:** An abdominal aortic aneurysm (AAA) is a swelling of the main artery in the  
18 body estimated to affect 0.92% of adults (aged 30-79) worldwide. Rupture is often fatal and  
19 surgical intervention may be offered if the risk of rupture is high. There is no treatment to  
20 prevent AAA or to slow aneurysm growth aside from dietary and lifestyle recommendations.  
21 Metformin, a drug prescribed to treat type 2 diabetes, has previously been associated with a  
22 potential reduction in AAA disease risk but no causal link has been shown. Here we  
23 investigate the causal link between Metformin and AAA risk through Mendelian  
24 randomisation (MR).

25 **Methods:** We conducted a two-sample MR analysis using genetic variants associated with  
26 gene expression of five Metformin drug targets that also show a genetic association with  
27 decreased glycated haemoglobin (HbA1c) levels. Effect sizes are obtained from within UK  
28 Biobank for HbA1c, and within AAAgen for AAA risk, a multi-ancestry meta-GWAS analysis of  
29 39,221 cases and 1,086,107 controls.

30 **Results:** We identified statistically significant evidence of a causal association between a  
31 genetic proxy for Metformin action and a decrease in AAA risk, OR=0.58 (95%CI: 0.37-0.90  
32  $p=0.015$ ). We estimate that on average a one standard deviation decrease in HbA1c,  
33 measured via Metformin gene targets, reduces AAA risk by over 40%.

34 **Conclusion:** Metformin use in those at increased risk of AAA may reduce incidence of  
35 disease. Clinical trials are required to assess the efficacy of Metformin in reducing disease  
36 risk.

1 **Introduction:** The only current treatment for abdominal aortic aneurysm (AAA) is surgical  
2 repair, which is associated with significant morbidity and mortality. Patients not fit enough  
3 for surgery have no treatment options. For people with small AAA there are no treatments  
4 to slow AAA growth and prevent the need for surgery in the future.

5 Diabetes is associated with reduced AAA risk but to date no evidence of a causal  
6 association has been found. Observational studies have shown that Metformin, a drug  
7 prescribed to lower glycated haemoglobin (HbA1c) in diabetics, is also associated with a  
8 reduction in AAA disease risk and reduced growth(1) and may be the driver of the reduced  
9 risk seen in people with diabetes. Whilst randomised trials are currently underway to test  
10 the effectiveness of metformin to prevent AAA progression(2,3), these are based on  
11 observational data and no causal link has been demonstrated. Here we utilise genetic  
12 variants to investigate the potential for a causal association between Metformin and AAA  
13 risk through Mendelian randomisation (MR).

14 **Methods:** We conducted MR using published instruments of genetic variants for known  
15 Metformin targets. Variants were identified through associated expression of genes  
16 involved in the action of these targets that also associated with HbA1c levels(4). This  
17 resulted in five instruments consisting of a total of 32 variants near 22 genes. The  
18 instruments represent Metformin's HbA1c lowering effect.

19 Effect sizes were independently estimated in European-ancestry subjects within UK  
20 Biobank (n=344,182) and represent changes in Z-standardised HbA1c where a unit change is  
21 estimated as 1.09% (~6.75mmol)(4). This amount is consistent with the effect size estimated  
22 in a systematic review of Metformin monotherapy; 1.12% (95%CI: 0.92-1.32)(5).

1 Effect sizes and standard error estimates for AAA risk were obtained from AAAGen,  
2 the largest genetic study on AAA risk to date: a multi-ancestry (European and African) meta-  
3 GWAS of 39,214 cases and 1,086,107 controls(6).

4 MR was conducted using the inverse variance weighted (MR-IVW) method(7) as our  
5 primary analysis for each individual target and also using an instrument of the five targets  
6 combined. To assess potential weak instrument bias or pleiotropy we applied MR-Egger,  
7 weighted-median, weighted-mode, MR-RAPS and MR-PRESSO as sensitivity analyses to the  
8 combined instrument(7). Effect estimates were compared across methods for evidence of  
9 consistency. To assess the specificity of the Metformin pathway we also assessed a genome-  
10 wide HbA1c instrument sourced from the same paper(4).

11 **Results:** Of the 32 independent variants ( $r^2 < 0.01$ ) we found 31 available within AAAGen.  
12 Analysing each target revealed consistent protective effects against AAA risk (**Figure** panel  
13 **A**). The combined instrument of 31 variants found statistically significant evidence ( $p=0.015$ )  
14 of a causal association between the HbA1c lowering effects across the five Metformin  
15 targets and a decrease in AAA risk. The combined instrument estimates a 43% reduction in  
16 risk due to a 1.09% decrease in HbA1c OR=0.57 (95%CI: 0.37-0.90). There was a small  
17 amount of overlap between the exposure and outcome samples, as AAAGen included UK  
18 Biobank AAA cases and up to 22,049 controls as part of the meta-analysis and the HbA1c  
19 effect sizes are estimated within UK Biobank. However, this is anticipated to have minimal  
20 effect on the estimates, except for MR-Egger, when using Biobank sized data(8). We also  
21 note a potential for increased heterogeneity between the datasets due to mixed ancestry,  
22 although allele frequencies between included samples were found to be consistent(6).

1 All sensitivity analyses were applied to the combined instrument due to the limited  
2 number of genes in each individual target and show strong consistency of effect size and  
3 direction (**Figure panel B**). The MR-Egger test for a non-zero intercept was not statistically  
4 significant ( $p=0.362$ ) suggesting no evidence of pleiotropy. MR analysis using the genome-  
5 wide HbA1c instrument showed no evidence of a causal association with AAA risk, OR=1.02  
6 (95%CI: 0.98-1.06).

7 **Discussion:** This study used genetic instruments to assess the potential therapeutic benefit  
8 of Metformin in reducing AAA risk via known Metformin targets. We provide evidence that  
9 Metformin has the potential to reduce AAA risk through target-specific HbA1c lowering  
10 mechanisms. Results were consistent across targets and sensitivity analyses. The desired  
11 reduction in HbA1c to achieve this risk reduction is within the estimated pharmacological  
12 effect of a clinical Metformin dose. While we have not shown a direct effect on AAA  
13 progression, the inferred benefit of Metformin treatment provides additional justification  
14 for ongoing clinical trials (2,3). Critically, no evidence of association with AAA risk was found  
15 using a whole-genome HbA1c instrument, giving further evidence to the specificity of an  
16 HbA1c change due to Metformin targets.

17 We acknowledge that the validity of the instrument and its suitability to represent  
18 Metformin effects has attracted comment and criticism(9,10). It is highly likely that there are  
19 Metformin pathways that have not have been captured here. Other pathways may  
20 counteract these protective effects and nullify or, even worse, cause harm and increase AAA  
21 risk. Whilst this is possible, it would be inconsistent with findings seen in observational  
22 studies. However, we recognise that this paper is limited to reporting results on five known

1 targets and that further work is required to be able to weight these correctly to obtain a  
2 more accurate combined effect estimate.

3 We also note that the instrument was constructed on postulated downstream  
4 effects of Metformin on glycaemic levels via known Metformin targets, and we cannot  
5 evaluate the effect of Metformin therapy in clinical practice(10). We have so far been unable  
6 to identify a suitable and meaningful positive control and therefore cannot confirm that the  
7 targets are a representation of the true Metformin effect.

8 Findings from clinical trials currently in progress to assess the impact of Metformin  
9 on AAA growth and risk of serious outcome(2,3) will soon help to shed light on what is  
10 difficult to ascertain here: that is, whether these targets represent a valid Metformin  
11 instrument or if the effects could be cancelled out by unaccounted pathways. With no  
12 medication currently available to reduce AAA risk or slow disease progression, we remain  
13 hopeful that our findings, in alignment with those seen in observational studies, will confirm  
14 that Metformin may prove to be a viable treatment option.

## 1 Funding

2 This research was funded in whole, or in part, by the Wellcome Trust (grant number  
3 222959/Z/21/Z) to KLS. For the purpose of open access, the author has applied a CC BY  
4 public copyright licence to any Author Accepted Manuscript version arising from this  
5 submission; British Heart Foundation (grant numbers CD/14/2/30841 and RG/18/10/33842  
6 to MJB, FD, CPN); and British Heart Foundation (grant number CH/F/22/90014) to MJB.

## 8 References

- 9 1) Golledge J, Moxon J, Pinchbeck J, Anderson G, Rowbotham S, Jenkins J et al. Association  
10 between metformin prescription and growth rates of abdominal aortic aneurysms. *Br J*  
11 *Surg* 2017;**104**:1486-1493.
- 12 2) Lareyre F, Raffort J. Metformin to Limit Abdominal Aortic Aneurysm Expansion: Time for  
13 Clinical Trials. *Eur J Vasc Endovasc Surg* 2021;**61**:1030.
- 14 3) Golledge J, Arnott C, Moxon J, Monaghan H, Norman R, Morris D et al. Protocol for the  
15 Metformin Aneurysm Trial (MAT): a placebo-controlled randomised trial testing whether  
16 metformin reduces the risk of serious complications of abdominal aortic aneurysm. *Current*  
17 *controlled trials in cardiovascular medicine; Trials* 2021;**22**:962.
- 18 4) Zheng J, Xu M, Walker V, Yuan J, Korologou-Linden R, Robinson J et al. Evaluating the efficacy  
19 and mechanism of metformin targets on reducing Alzheimer's disease risk in the general  
20 population: a Mendelian randomisation study. *Diabetologia* 2022;**65**:1664-1675.
- 21 5) Hirst JA, Farmer AJ, Ali R, Roberts NW, Stevens RJ. Quantifying the effect of metformin  
22 treatment and dose on glycemc control. *Diabetes Care* 2012;**35**:446-454.
- 23 6) Roychowdhury T. et al. Multi-ancestry GWAS deciphers genetic architecture of abdominal  
24 aortic aneurysm and highlights PCSK9 as a therapeutic target. *MedRxiv* 2022; doi:  
25 [10.1101/2022.05.27.22275607](https://doi.org/10.1101/2022.05.27.22275607).
- 26 7) Burgess S, Davey Smith G, Davies NM, Dudbridge F, Gill D, Glymour MM et al. Guidelines for  
27 performing Mendelian randomization investigations. *Wellcome open research; Wellcome*  
28 *Open Res* 2019;**4**:186.
- 29 8) Minelli C, Del Greco M F, van der Plaats D,A., Bowden J, Sheehan NA, Thompson J. The use of  
30 two-sample methods for Mendelian randomization analyses on single large datasets. *Int J*  
31 *Epidemiol* 2021;**50**:1651-1659.
- 32 9) Anderson EL, Williams DM. Drug target Mendelian randomisation: are we really  
33 instrumenting drug use? *Diabetologia* 2023;**66**:1156-1158.
- 34 10) Burgess S, Mason AM, Grant AJ, Slob EAW, Gkatzionis A, Zuber V et al. Using genetic  
35 association data to guide drug discovery and development: Review of methods and  
36 applications. *Am J Hum Genet* 2023;**110**:195-214.

37

1 **Legends**

2 **\*Non-targeted-whole-genome HbA1c instrument**

3 **Figure: Associations between genetically predicted HbA1c levels via 22 genes / 31 variants and**  
4 **abdominal aortic aneurysm risk from two-sample Mendelian randomisation analyses.** Where n  
5 genes indicates the number of genes in each pathway. Odds ratio (OR) estimates represent a 1.09%  
6 decrease (~6.75mmol/mol or 1 s.d.) in HbA1c. **Panel A:** Primary analysis of individual Metformin-  
7 drug target pathways estimated using MR-IVW, combined pathways of 31 genetic variants in the  
8 instrument, and genome-wide HbA1c estimate using inverse weighted variance method showing OR  
9 and 95% confidence intervals. **Panel B:** Sensitivity analysis of the combined 31 variant instrument.  
10 The MR-PRESSO estimate represents IVW after the removal of two potential outlier variants.

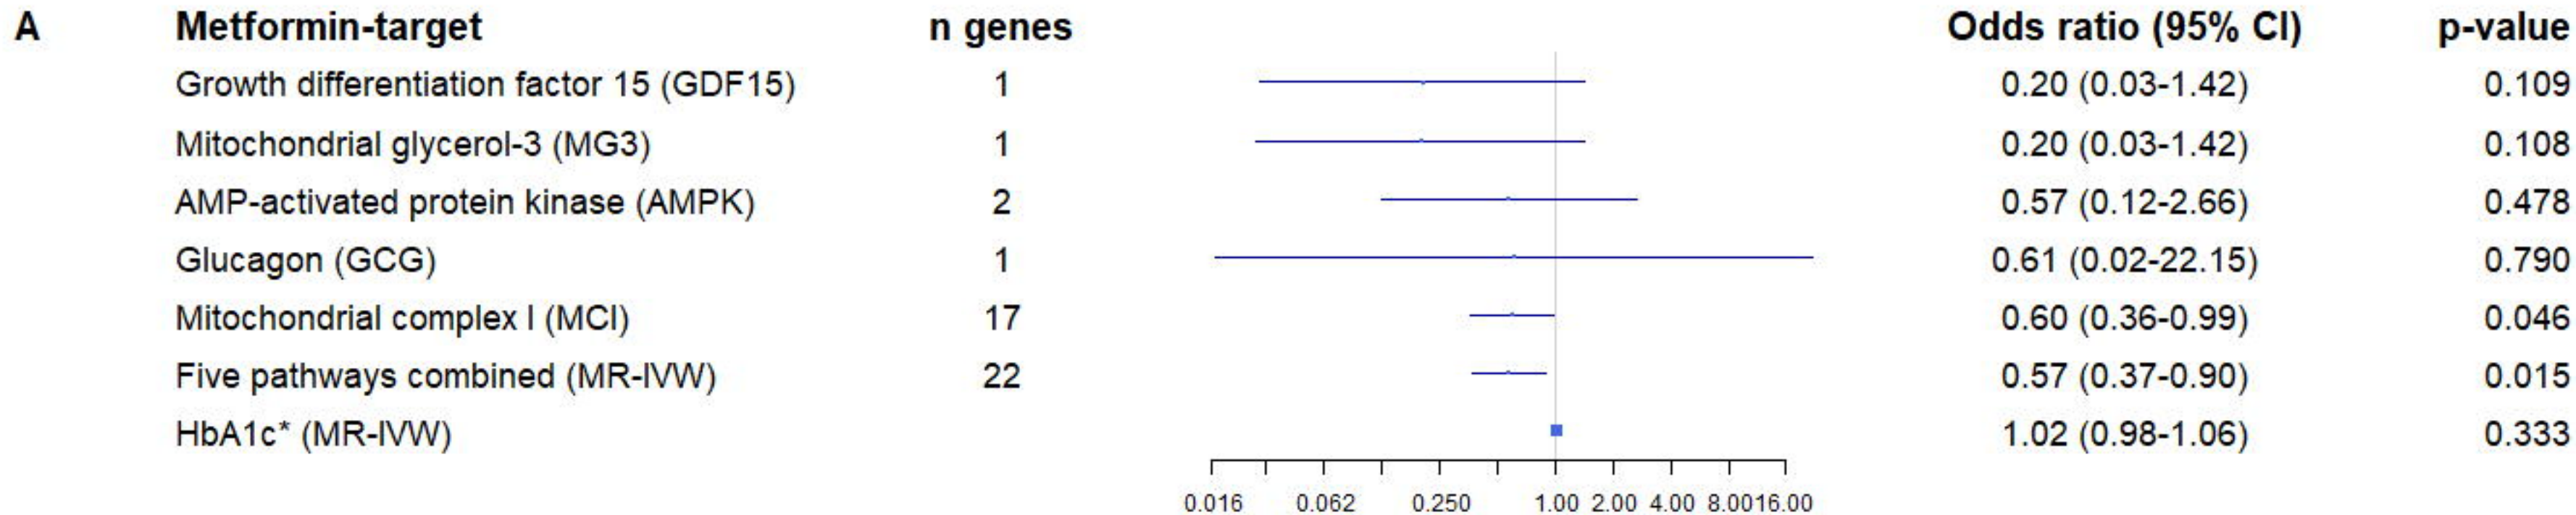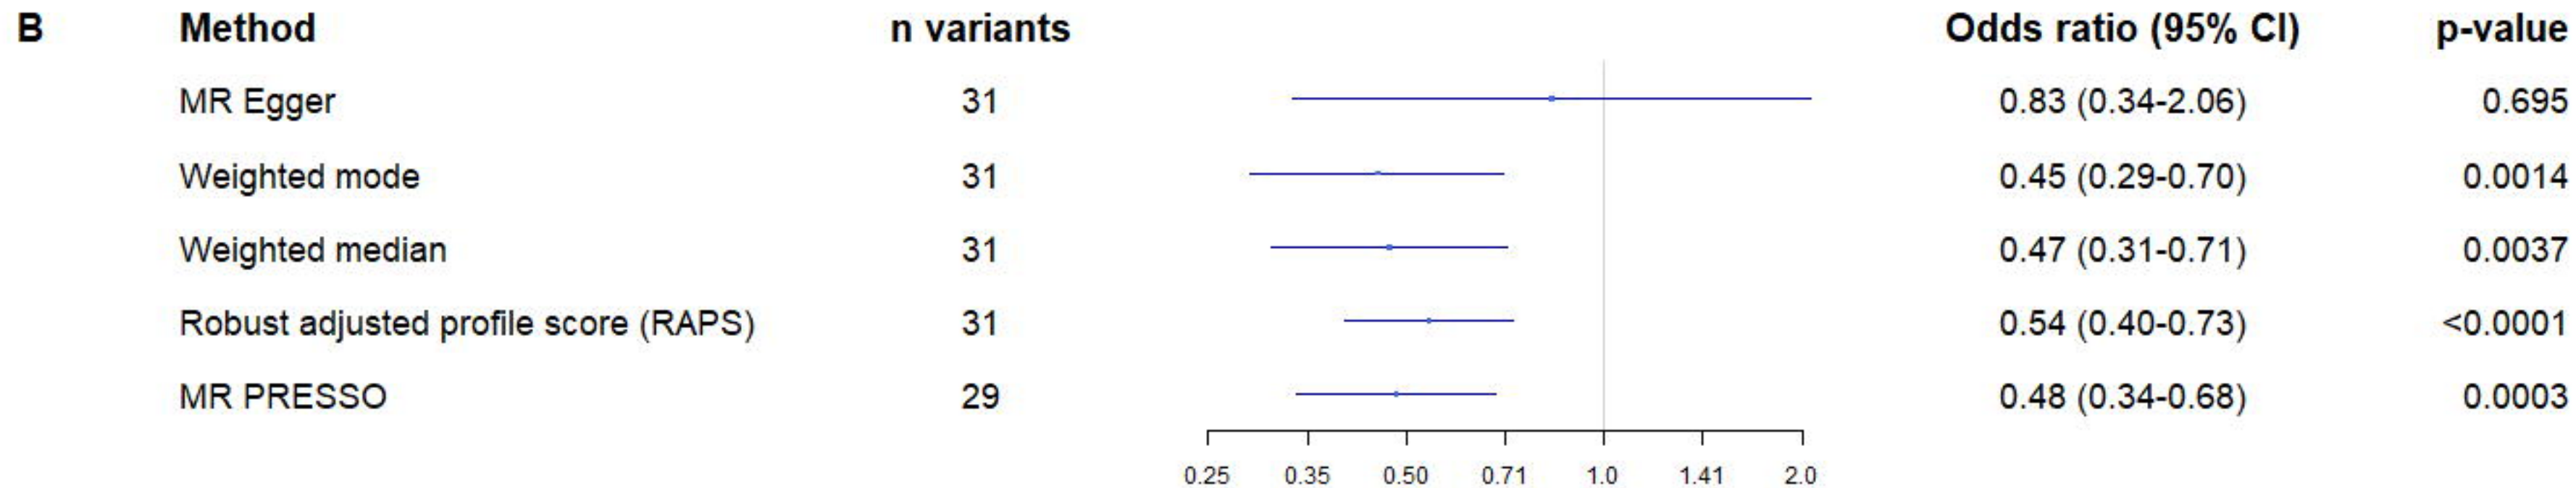

Source: https://medrxiv.org/content/10.1101/2023.10.13.23293381.full.pdf
